# Supplementary material for: Triple-Negative Breast Cancer with High Levels of Annexin A1 Expression Is Associated with Mast Cell Infiltration, Inflammation, and Angiogenesis
Source: PubMed Central journal article supplement (PMC6747082; doi:10.3390/ijms20174197), 2019-08-27
Supplement: ijms-20-04197-s001.pdf [file ijms-20-04197-s001.pdf]

Supplementary Table S1. Clinical factors and ANXA1 protein expression in 48 breast cancer cases.

| Characteristics       | Total (n=48) | ANXA1           |                 | P-value |
|-----------------------|--------------|-----------------|-----------------|---------|
|                       |              | positive (n=17) | negative (n=31) |         |
| Age                   |              |                 |                 | 0.524   |
| <50                   | 16           | 7               | 9               |         |
| ≥50                   | 32           | 10              | 22              |         |
| pTMN stage            |              |                 |                 | 0.311   |
| I                     | 18           | 5               | 13              |         |
| IIA                   | 13           | 3               | 10              |         |
| IIB                   | 16           | 8               | 8               |         |
| III                   | 1            | 1               | 0               |         |
| Lymph node metastasis |              |                 |                 | 0.551   |
| positive              | 22           | 9               | 13              |         |
| negative              | 26           | 8               | 18              |         |
| Histology             |              |                 |                 | 0.396   |
| Invasive ductal       | 41           | 16              | 25              |         |
| Others                | 7            | 1               | 6               |         |
| Histological Grade    |              |                 |                 | 0.211   |
| 1,2                   | 23           | 6               | 17              |         |
| 3                     | 21           | 10              | 11              |         |
| not reported          | 4            | 1               | 3               |         |
| Lymphatic invasion    |              |                 |                 | 1       |
| positive              | 24           | 9               | 15              |         |
| negative              | 21           | 7               | 14              |         |
| not reported          | 3            | 1               | 2               |         |
| Venous invasion       |              |                 |                 | 0.131   |
| positive              | 10           | 6               | 4               |         |
| negative              | 35           | 10              | 25              |         |
| not reported          | 3            | 1               | 2               |         |

Table1. Significant gene sets that associated with high expression of AR using Gene Set Enrichment Analysis (GSEA)(TCGA)

| NAME                    | SIZE | ES     | NES    | NOM<br>p-val | FDR<br>q-val | FWER<br>p-val |
|-------------------------|------|--------|--------|--------------|--------------|---------------|
| HALLMARK_UV_RESPONSE_DN | 140  | 0.5521 | 2.0113 | 0.0000       | 0.0126       | 0.0210        |

1 ES, enrichment score; 2 NES, normalized enrichment score; 3 NOM-p-val, normalized p-value; 4 FDR q-val, false discovery rate q-value;  
5 FWER p-val, family-wise error rate p-value

Table2. Significant gene sets that associated with low expression of AR using Gene Set Enrichment Analysis (GSEA)(TCGA)

| NAME                | SIZE | ES      | NES     | NOM<br>p-val | FDR<br>q-val | FWER<br>p-val |
|---------------------|------|---------|---------|--------------|--------------|---------------|
| HALLMARK_DNA_REPAIR | 142  | -0.5265 | -2.0298 | 0.0000       | 0.0281       | 0.0150        |

1 ES, enrichment score; 2 NES, normalized enrichment score; 3 NOM-p-val, normalized p-value; 4 FDR q-val, false discovery rate q-value;  
5 FWER p-val, family-wise error rate p-value

Supplementary Table S2. Clinical factors and ANXA1 mRNA expression in TCGA and METABRIC TNBC cohorts.

| Characteristics       | TCGA             |             |            |         | METABRIC         |              |             |         |
|-----------------------|------------------|-------------|------------|---------|------------------|--------------|-------------|---------|
|                       | Total<br>(n=173) | ANXA1       |            | P-value | Total<br>(n=313) | ANXA1        |             | P-value |
|                       |                  | high (n=87) | low (n=86) |         |                  | high (n=157) | low (n=156) |         |
| Age                   |                  |             |            | 0.588   |                  |              |             | 0.437   |
|                       | <50              | 55          | 26         | 29      | 115              | 61           | 54          |         |
|                       | ≥50              | 118         | 61         | 57      | 198              | 96           | 102         |         |
| stage                 |                  |             |            |         |                  |              |             |         |
|                       | pTMN             |             |            | 0.374   | T                |              |             | 0.194   |
|                       | I                | 30          | 15         | 15      | 1                | 65           | 33          | 32      |
|                       | II               | 111         | 55         | 56      | 2                | 136          | 67          | 69      |
|                       | III              | 27          | 14         | 13      | 3                | 26           | 14          | 12      |
|                       | IV               | 2           | 2          | 0       |                  |              |             |         |
| Lymph node metastasis |                  |             |            | 0.294   |                  |              |             |         |
|                       | positive         | 63          | 35         | 28      | N/A              | N/A          | N/A         |         |
|                       | negative         | 110         | 52         | 58      | N/A              | N/A          | N/A         |         |
| Histology             |                  |             |            | 0.521   |                  |              |             | 0.594   |
|                       | Invasive ductal  | 150         | 74         | 76      | 280              | 139          | 141         |         |
|                       | Others           | 23          | 13         | 10      | 33               | 18           | 15          |         |
| Histological Grade    |                  |             |            | 0.433   |                  |              |             | 0.07    |
|                       | 1,2              | 15          | 7          | 8       | 42               | 28           | 14          |         |
|                       | 3                | 99          | 48         | 51      | 267              | 127          | 140         |         |

|              |              |     |    |    |       |     |     |     |
|--------------|--------------|-----|----|----|-------|-----|-----|-----|
| Race         | not reported | 58  | 31 | 27 |       | 4   | 2   | 2   |
|              |              |     |    |    | 0.669 |     |     |     |
|              | White        | 102 | 53 | 49 |       | N/A | N/A | N/A |
|              | BLACK OR     |     |    |    |       |     |     |     |
|              | AFRICAN      | 55  | 27 | 28 |       | N/A | N/A | N/A |
|              | AMERICAN     |     |    |    |       |     |     |     |
|              | ASIAN        | 8   | 4  | 4  |       | N/A | N/A | N/A |
| not reported | 8            | 3   | 5  |    | N/A   | N/A | N/A |     |

---

Supplementary Table S3. Significant gene sets that associated to high expression of ANXA1 using Gene Set Enrichment Analysis (GSEA)(TCGA)

| Gene Set Name                              | SIZE | ES <sup>1</sup> | NES <sup>2</sup> | NOM p-val <sup>3</sup> | FDR q-val <sup>4</sup> | FWER p-val <sup>5</sup> |
|--------------------------------------------|------|-----------------|------------------|------------------------|------------------------|-------------------------|
| HALLMARK_TGF_BETA_SIGNALING                | 51   | 0.6593          | 2.1881           | 0.0000                 | 0.0031                 | 0.0030                  |
| HALLMARK_TNFA_SIGNALING_VIA_NFKB           | 193  | 0.6371          | 2.1813           | 0.0000                 | 0.0015                 | 0.0030                  |
| HALLMARK_EPITHELIAL_MESENCHYMAL_TRANSITION | 193  | 0.6933          | 2.1555           | 0.0000                 | 0.0014                 | 0.0030                  |
| HALLMARK_HYPOXIA                           | 195  | 0.5159          | 2.1329           | 0.0000                 | 0.0010                 | 0.0030                  |
| HALLMARK_KRAS_SIGNALING_UP                 | 190  | 0.5024          | 2.0277           | 0.0000                 | 0.0047                 | 0.0160                  |
| HALLMARK_ANGIOGENESIS                      | 36   | 0.6510          | 1.9649           | 0.0000                 | 0.0093                 | 0.0350                  |
| HALLMARK_COAGULATION                       | 134  | 0.5121          | 1.9642           | 0.0000                 | 0.0080                 | 0.0350                  |
| HALLMARK_UV_RESPONSE_DN                    | 140  | 0.5317          | 1.9442           | 0.0000                 | 0.0087                 | 0.0430                  |
| HALLMARK_INFLAMMATORY_RESPONSE             | 194  | 0.5598          | 1.8843           | 0.0078                 | 0.0146                 | 0.0770                  |
| HALLMARK_APICAL_JUNCTION                   | 194  | 0.4400          | 1.8539           | 0.0000                 | 0.0192                 | 0.1050                  |
| HALLMARK_APOPTOSIS                         | 158  | 0.4248          | 1.8009           | 0.0000                 | 0.0290                 | 0.1540                  |
| HALLMARK_COMPLEMENT                        | 192  | 0.4599          | 1.7553           | 0.0233                 | 0.0391                 | 0.2020                  |
| HALLMARK_IL2_STAT5_SIGNALING               | 193  | 0.4142          | 1.7211           | 0.0233                 | 0.0467                 | 0.2510                  |

<sup>1</sup>ES, enrichment score; <sup>2</sup>NES, normalized enrichment score; <sup>3</sup>NOM-p-val, normalized p-value; <sup>4</sup>FDR q-val, false discovery rate q-value; <sup>5</sup>FWER p-val, family-wise error rate p-value

Supplementary Table S4. Significant gene sets that associated to high expression of ANXA1 using Gene Set Enrichment Analysis (GSEA)(METABRIC)

| Gene Set Name                              | SIZE | ES <sup>1</sup> | NES <sup>2</sup> | NOM p-val <sup>3</sup> | FDR q-val <sup>4</sup> | FWER p-val <sup>5</sup> |
|--------------------------------------------|------|-----------------|------------------|------------------------|------------------------|-------------------------|
| HALLMARK_KRAS_SIGNALING_UP                 | 189  | 0.6492          | 2.4215           | 0.0000                 | 0.0000                 | 0.0000                  |
| HALLMARK_TNFA_SIGNALING_VIA_NFKB           | 192  | 0.7142          | 2.3985           | 0.0000                 | 0.0000                 | 0.0000                  |
| HALLMARK_COAGULATION                       | 128  | 0.6688          | 2.3712           | 0.0000                 | 0.0000                 | 0.0000                  |
| HALLMARK_EPITHELIAL_MESENCHYMAL_TRANSITION | 191  | 0.7919          | 2.3509           | 0.0000                 | 0.0000                 | 0.0000                  |
| HALLMARK_APOPTOSIS                         | 153  | 0.6113          | 2.3457           | 0.0000                 | 0.0000                 | 0.0000                  |
| HALLMARK_HYPOXIA                           | 194  | 0.5964          | 2.2638           | 0.0000                 | 0.0000                 | 0.0000                  |
| HALLMARK_INFLAMMATORY_RESPONSE             | 190  | 0.6673          | 2.2433           | 0.0000                 | 0.0000                 | 0.0000                  |
| HALLMARK_COMPLEMENT                        | 187  | 0.6308          | 2.2076           | 0.0000                 | 0.0002                 | 0.0010                  |
| HALLMARK_IL2_STAT5_SIGNALING               | 192  | 0.5580          | 2.1498           | 0.0000                 | 0.0003                 | 0.0020                  |
| HALLMARK_ANGIOGENESIS                      | 33   | 0.7168          | 2.1103           | 0.0019                 | 0.0004                 | 0.0030                  |
| HALLMARK_IL6_JAK_STAT3_SIGNALING           | 82   | 0.6872          | 2.0758           | 0.0000                 | 0.0006                 | 0.0040                  |
| HALLMARK_TGF_BETA_SIGNALING                | 51   | 0.6101          | 2.0716           | 0.0000                 | 0.0008                 | 0.0050                  |
| HALLMARK_UV_RESPONSE_DN                    | 142  | 0.5352          | 2.0201           | 0.0000                 | 0.0013                 | 0.0100                  |
| HALLMARK_APICAL_JUNCTION                   | 188  | 0.4785          | 1.9148           | 0.0036                 | 0.0061                 | 0.0390                  |
| HALLMARK_ALLOGRAFT_REJECTION               | 183  | 0.6220          | 1.8311           | 0.0095                 | 0.0130                 | 0.0940                  |
| HALLMARK_P53_PATHWAY                       | 188  | 0.4159          | 1.8221           | 0.0000                 | 0.0132                 | 0.1010                  |
| HALLMARK_PROTEIN_SECRETION                 | 94   | 0.5077          | 1.7759           | 0.0174                 | 0.0202                 | 0.1350                  |
| HALLMARK_MYOGENESIS                        | 192  | 0.4469          | 1.6937           | 0.0141                 | 0.0401                 | 0.2430                  |
| HALLMARK_INTERFERON_GAMMA_RESPONSE         | 186  | 0.6116          | 1.6848           | 0.0474                 | 0.0413                 | 0.2590                  |

<sup>1</sup> ES, enrichment score <sup>2</sup> NES, normalized enrichment score; <sup>3</sup> NOM-p-val, normalized p-value; <sup>4</sup> FDR q-val, false discovery rate q-value; <sup>5</sup> FWER p-val, family-wise error rate p-value
